# Supplementary material
Source: PubMed Central journal article supplement (PMC9444380)
Supplement: NIHMS1695412-supplement-Appendix_III.pdf [file NIHMS1695412-supplement-Appendix_III.pdf]

## Q1 Name of your PM&amp;R Residency Program:

Answered: 35 Skipped: 0

| #  | RESPONSES | DATE                |
|----|-----------|---------------------|
| 1  | Redacted  | 3/7/2019 11:13 AM   |
| 2  | Redacted  | 3/7/2019 11:12 AM   |
| 3  | Redacted  | 3/7/2019 11:10 AM   |
| 4  | Redacted  | 3/7/2019 11:09 AM   |
| 5  | Redacted  | 3/7/2019 11:07 AM   |
| 6  | Redacted  | 3/7/2019 11:05 AM   |
| 7  | Redacted  | 3/7/2019 11:03 AM   |
| 8  | Redacted  | 3/7/2019 11:02 AM   |
| 9  | Redacted  | 3/7/2019 11:00 AM   |
| 10 | Redacted  | 3/7/2019 10:40 AM   |
| 11 | Redacted  | 3/7/2019 10:37 AM   |
| 12 | Redacted  | 3/7/2019 10:36 AM   |
| 13 | Redacted  | 2/20/2019 7:03 AM   |
| 14 | Redacted  | 1/26/2019 2:17 PM   |
| 15 | Redacted  | 1/25/2019 7:59 PM   |
| 16 | Redacted  | 1/24/2019 4:14 PM   |
| 17 | Redacted  | 1/23/2019 3:24 PM   |
| 18 | Redacted  | 1/2/2019 1:50 PM    |
| 19 | Redacted  | 12/18/2018 1:50 PM  |
| 20 | Redacted  | 12/18/2018 1:35 PM  |
| 21 | Redacted  | 11/29/2018 5:16 PM  |
| 22 | Redacted  | 11/28/2018 10:29 PM |
| 23 | Redacted  | 11/28/2018 11:57 AM |
| 24 | Redacted  | 11/28/2018 11:12 AM |
| 25 | Redacted  | 11/14/2018 2:37 PM  |
| 26 | Redacted  | 11/12/2018 10:38 AM |
| 27 | Redacted  | 11/8/2018 4:41 PM   |
| 28 | Redacted  | 11/7/2018 2:11 PM   |
| 29 | Redacted  | 11/7/2018 12:23 PM  |
| 30 | Redacted  | 11/7/2018 11:45 AM  |
| 31 | Redacted  | 11/7/2018 10:30 AM  |
| 32 | Redacted  | 11/7/2018 10:16 AM  |
| 33 | Redacted  | 11/7/2018 9:28 AM   |
| 34 | Redacted  | 11/7/2018 9:10 AM   |
| 35 | Redacted  | 11/7/2018 9:05 AM   |

## Q2 Country where your residency program is located:

Answered: 35 Skipped: 0

| #  | RESPONSES                | DATE                |
|----|--------------------------|---------------------|
| 1  | USA                      | 3/7/2019 11:13 AM   |
| 2  | USA                      | 3/7/2019 11:12 AM   |
| 3  | USA                      | 3/7/2019 11:10 AM   |
| 4  | USA                      | 3/7/2019 11:09 AM   |
| 5  | USA                      | 3/7/2019 11:07 AM   |
| 6  | USA                      | 3/7/2019 11:05 AM   |
| 7  | USA                      | 3/7/2019 11:03 AM   |
| 8  | USA                      | 3/7/2019 11:02 AM   |
| 9  | USA                      | 3/7/2019 11:00 AM   |
| 10 | USA                      | 3/7/2019 10:40 AM   |
| 11 | US                       | 3/7/2019 10:37 AM   |
| 12 | USA                      | 3/7/2019 10:36 AM   |
| 13 | United States of America | 2/20/2019 7:03 AM   |
| 14 | USA                      | 1/26/2019 2:17 PM   |
| 15 | USA                      | 1/25/2019 7:59 PM   |
| 16 | USA                      | 1/24/2019 4:14 PM   |
| 17 | USA                      | 1/23/2019 3:24 PM   |
| 18 | US                       | 1/2/2019 1:50 PM    |
| 19 | USA                      | 12/18/2018 1:50 PM  |
| 20 | USA                      | 12/18/2018 1:35 PM  |
| 21 | USA                      | 11/29/2018 5:16 PM  |
| 22 | United States            | 11/28/2018 10:29 PM |
| 23 | USA                      | 11/28/2018 11:57 AM |
| 24 | US                       | 11/28/2018 11:12 AM |
| 25 | USA                      | 11/14/2018 2:37 PM  |
| 26 | USA                      | 11/12/2018 10:38 AM |
| 27 | USA                      | 11/8/2018 4:41 PM   |
| 28 | US                       | 11/7/2018 2:11 PM   |
| 29 | USA                      | 11/7/2018 12:23 PM  |
| 30 | USA                      | 11/7/2018 11:45 AM  |
| 31 | USA                      | 11/7/2018 10:30 AM  |
| 32 | USA                      | 11/7/2018 10:16 AM  |
| 33 | USA                      | 11/7/2018 9:28 AM   |
| 34 | USA                      | 11/7/2018 9:10 AM   |
| 35 | USA                      | 11/7/2018 9:05 AM   |

## Q3 Total number of residents enrolled currently:

Answered: 35 Skipped: 0

| #  | RESPONSES | DATE                |
|----|-----------|---------------------|
| 1  | Redacted  | 3/7/2019 11:13 AM   |
| 2  | Redacted  | 3/7/2019 11:12 AM   |
| 3  | Redacted  | 3/7/2019 11:10 AM   |
| 4  | Redacted  | 3/7/2019 11:09 AM   |
| 5  | Redacted  | 3/7/2019 11:07 AM   |
| 6  | Redacted  | 3/7/2019 11:05 AM   |
| 7  | Redacted  | 3/7/2019 11:03 AM   |
| 8  | Redacted  | 3/7/2019 11:02 AM   |
| 9  | Redacted  | 3/7/2019 11:00 AM   |
| 10 | Redacted  | 3/7/2019 10:40 AM   |
| 11 | Redacted  | 3/7/2019 10:37 AM   |
| 12 | Redacted  | 3/7/2019 10:36 AM   |
| 13 | Redacted  | 2/20/2019 7:03 AM   |
| 14 | Redacted  | 1/26/2019 2:17 PM   |
| 15 | Redacted  | 1/25/2019 7:59 PM   |
| 16 | Redacted  | 1/24/2019 4:14 PM   |
| 17 | Redacted  | 1/23/2019 3:24 PM   |
| 18 | Redacted  | 1/2/2019 1:50 PM    |
| 19 | Redacted  | 12/18/2018 1:50 PM  |
| 20 | Redacted  | 12/18/2018 1:35 PM  |
| 21 | Redacted  | 11/29/2018 5:16 PM  |
| 22 | Redacted  | 11/28/2018 10:29 PM |
| 23 | Redacted  | 11/28/2018 11:57 AM |
| 24 | Redacted  | 11/28/2018 11:12 AM |
| 25 | Redacted  | 11/14/2018 2:37 PM  |
| 26 | Redacted  | 11/12/2018 10:38 AM |
| 27 | Redacted  | 11/8/2018 4:41 PM   |
| 28 | Redacted  | 11/7/2018 2:11 PM   |
| 29 | Redacted  | 11/7/2018 12:23 PM  |
| 30 | Redacted  | 11/7/2018 11:45 AM  |
| 31 | Redacted  | 11/7/2018 10:30 AM  |
| 32 | Redacted  | 11/7/2018 10:16 AM  |
| 33 | Redacted  | 11/7/2018 9:28 AM   |
| 34 | Redacted  | 11/7/2018 9:10 AM   |
| 35 | Redacted  | 11/7/2018 9:05 AM   |

## Q4 Average class size per academic year:

Answered: 35 Skipped: 0

| #  | RESPONSES | DATE                |
|----|-----------|---------------------|
| 1  | Redacted  | 3/7/2019 11:13 AM   |
| 2  | Redacted  | 3/7/2019 11:12 AM   |
| 3  | Redacted  | 3/7/2019 11:10 AM   |
| 4  | Redacted  | 3/7/2019 11:09 AM   |
| 5  | Redacted  | 3/7/2019 11:07 AM   |
| 6  | Redacted  | 3/7/2019 11:05 AM   |
| 7  | Redacted  | 3/7/2019 11:03 AM   |
| 8  | Redacted  | 3/7/2019 11:02 AM   |
| 9  | Redacted  | 3/7/2019 11:00 AM   |
| 10 | Redacted  | 3/7/2019 10:40 AM   |
| 11 | Redacted  | 3/7/2019 10:37 AM   |
| 12 | Redacted  | 3/7/2019 10:36 AM   |
| 13 | Redacted  | 2/20/2019 7:03 AM   |
| 14 | Redacted  | 1/26/2019 2:17 PM   |
| 15 | Redacted  | 1/25/2019 7:59 PM   |
| 16 | Redacted  | 1/24/2019 4:14 PM   |
| 17 | Redacted  | 1/23/2019 3:24 PM   |
| 18 | Redacted  | 1/2/2019 1:50 PM    |
| 19 | Redacted  | 12/18/2018 1:50 PM  |
| 20 | Redacted  | 12/18/2018 1:35 PM  |
| 21 | Redacted  | 11/29/2018 5:16 PM  |
| 22 | Redacted  | 11/28/2018 10:29 PM |
| 23 | Redacted  | 11/28/2018 11:57 AM |
| 24 | Redacted  | 11/28/2018 11:12 AM |
| 25 | Redacted  | 11/14/2018 2:37 PM  |
| 26 | Redacted  | 11/12/2018 10:38 AM |
| 27 | Redacted  | 11/8/2018 4:41 PM   |
| 28 | Redacted  | 11/7/2018 2:11 PM   |
| 29 | Redacted  | 11/7/2018 12:23 PM  |
| 30 | Redacted  | 11/7/2018 11:45 AM  |
| 31 | Redacted  | 11/7/2018 10:30 AM  |
| 32 | Redacted  | 11/7/2018 10:16 AM  |
| 33 | Redacted  | 11/7/2018 9:28 AM   |
| 34 | Redacted  | 11/7/2018 9:10 AM   |
| 35 | Redacted  | 11/7/2018 9:05 AM   |

## Q5 Total number of PM&amp;R faculty in your program:

Answered: 34 Skipped: 1

| #  | RESPONSES | DATE                |
|----|-----------|---------------------|
| 1  | Redacted  | 3/7/2019 11:13 AM   |
| 2  | Redacted  | 3/7/2019 11:12 AM   |
| 3  | Redacted  | 3/7/2019 11:10 AM   |
| 4  | Redacted  | 3/7/2019 11:09 AM   |
| 5  | Redacted  | 3/7/2019 11:07 AM   |
| 6  | Redacted  | 3/7/2019 11:05 AM   |
| 7  | Redacted  | 3/7/2019 11:03 AM   |
| 8  | Redacted  | 3/7/2019 11:02 AM   |
| 9  | Redacted  | 3/7/2019 11:00 AM   |
| 10 | Redacted  | 3/7/2019 10:40 AM   |
| 11 | Redacted  | 3/7/2019 10:37 AM   |
| 12 | Redacted  | 3/7/2019 10:36 AM   |
| 13 | Redacted  | 1/26/2019 2:17 PM   |
| 14 | Redacted  | 1/25/2019 7:59 PM   |
| 15 | Redacted  | 1/24/2019 4:14 PM   |
| 16 | Redacted  | 1/23/2019 3:24 PM   |
| 17 | Redacted  | 1/2/2019 1:50 PM    |
| 18 | Redacted  | 12/18/2018 1:50 PM  |
| 19 | Redacted  | 12/18/2018 1:35 PM  |
| 20 | Redacted  | 11/29/2018 5:16 PM  |
| 21 | Redacted  | 11/28/2018 10:29 PM |
| 22 | Redacted  | 11/28/2018 11:57 AM |
| 23 | Redacted  | 11/28/2018 11:12 AM |
| 24 | Redacted  | 11/14/2018 2:37 PM  |
| 25 | Redacted  | 11/12/2018 10:38 AM |
| 26 | Redacted  | 11/8/2018 4:41 PM   |
| 27 | Redacted  | 11/7/2018 2:11 PM   |
| 28 | Redacted  | 11/7/2018 12:23 PM  |
| 29 | Redacted  | 11/7/2018 11:45 AM  |
| 30 | Redacted  | 11/7/2018 10:30 AM  |
| 31 | Redacted  | 11/7/2018 10:16 AM  |
| 32 | Redacted  | 11/7/2018 9:28 AM   |
| 33 | Redacted  | 11/7/2018 9:10 AM   |
| 34 | Redacted  | 11/7/2018 9:05 AM   |

### Q6 Does your PM&R residency program currently provide formal EBM education?

Answered: 35 Skipped: 0

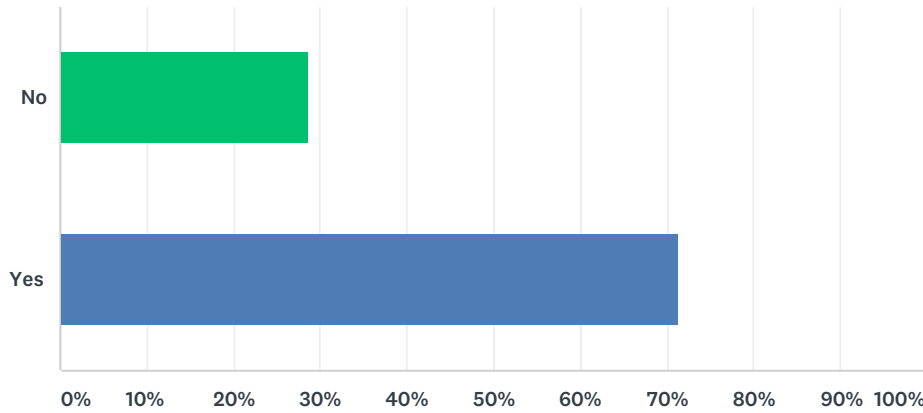

| ANSWER CHOICES | RESPONSES |    |
|----------------|-----------|----|
| No             | 28.57%    | 10 |
| Yes            | 71.43%    | 25 |
| TOTAL          |           | 35 |

### Q7 In what format is the EBM education provided? (check all that apply)

Answered: 24 Skipped: 11

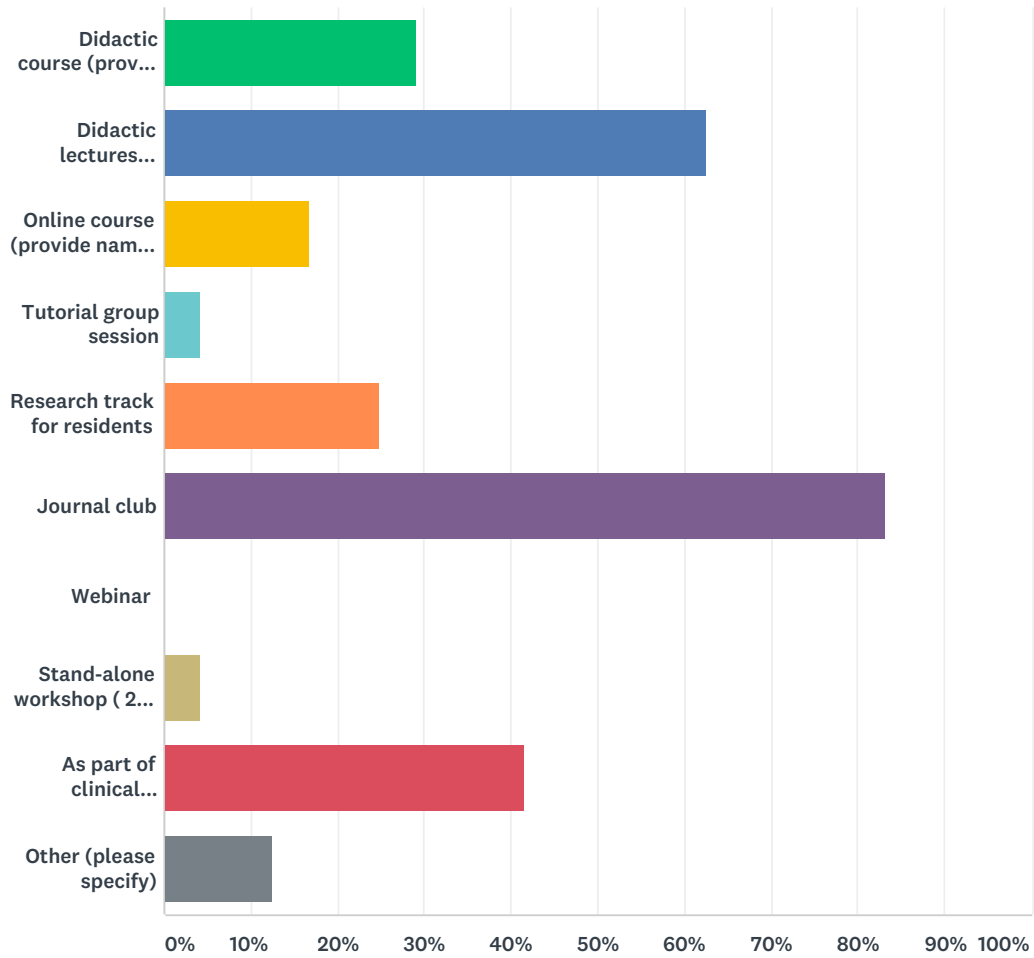

| ANSWER CHOICES                                               | RESPONSES |    |
|--------------------------------------------------------------|-----------|----|
| Didactic course (provide name below in Question 7)           | 29.17%    | 7  |
| Didactic lectures (isolated lectures not part of EBM course) | 62.50%    | 15 |
| Online course (provide name below in Question 7)             | 16.67%    | 4  |
| Tutorial group session                                       | 4.17%     | 1  |
| Research track for residents                                 | 25.00%    | 6  |
| Journal club                                                 | 83.33%    | 20 |
| Webinar                                                      | 0.00%     | 0  |
| Stand-alone workshop ( 2 - 3 day workshop)                   | 4.17%     | 1  |
| As part of clinical education                                | 41.67%    | 10 |
| Other (please specify)                                       | 12.50%    | 3  |
| Total Respondents: 24                                        |           |    |

## Evidence-Based Medicine Curriculum Survey

| # | OTHER (PLEASE SPECIFY)       | DATE                |
|---|------------------------------|---------------------|
| 1 | Creation of critical reviews | 3/7/2019 11:04 AM   |
| 2 | 1 month Research Rotation    | 11/12/2018 10:40 AM |
| 3 | NIH online research course   | 11/7/2018 10:30 AM  |



## Q8 Provide Didactic and/or Online course name(s) here, if applicable:

Answered: 11 Skipped: 24

| #  | RESPONSES                                                                                                                                                                                                                | DATE                |
|----|--------------------------------------------------------------------------------------------------------------------------------------------------------------------------------------------------------------------------|---------------------|
| 1  | n/a                                                                                                                                                                                                                      | 3/7/2019 11:11 AM   |
| 2  | Grand Rounds                                                                                                                                                                                                             | 3/7/2019 11:08 AM   |
| 3  | 8 week course                                                                                                                                                                                                            | 3/7/2019 11:04 AM   |
| 4  | Journal Club Research Didactic Series                                                                                                                                                                                    | 3/7/2019 11:00 AM   |
| 5  | Journal Club                                                                                                                                                                                                             | 3/7/2019 10:36 AM   |
| 6  | No formal name                                                                                                                                                                                                           | 2/20/2019 7:09 AM   |
| 7  | Human research online modules                                                                                                                                                                                            | 1/24/2019 4:16 PM   |
| 8  | The Redacted have multiple lectures re: EBM both lecture based and small group hands on during their pediatrics months (i.e. formal curriculum). On the Redacted side they get approx. one, 1 hr lecture every 1.5 years | 1/2/2019 1:53 PM    |
| 9  | Redacted                                                                                                                                                                                                                 | 11/28/2018 11:59 AM |
| 10 | Didactic in research methodology, includes a Critically Appraised Topic write up and presentation                                                                                                                        | 11/8/2018 4:43 PM   |
| 11 | Redacted                                                                                                                                                                                                                 | 11/7/2018 11:47 AM  |

## Q9 Length of time (years) since introduction of formal EBM education:

Answered: 21 Skipped: 14

| #  | RESPONSES           | DATE                |
|----|---------------------|---------------------|
| 1  | unknown             | 3/7/2019 11:12 AM   |
| 2  | 10                  | 3/7/2019 11:11 AM   |
| 3  | 1                   | 3/7/2019 11:09 AM   |
| 4  | 10                  | 3/7/2019 11:08 AM   |
| 5  | 3                   | 3/7/2019 11:05 AM   |
| 6  | 10                  | 3/7/2019 11:04 AM   |
| 7  | 3                   | 3/7/2019 11:00 AM   |
| 8  | 2                   | 3/7/2019 10:40 AM   |
| 9  | 2                   | 3/7/2019 10:38 AM   |
| 10 | 1                   | 3/7/2019 10:36 AM   |
| 11 | >15 years           | 1/24/2019 4:16 PM   |
| 12 | 4+ years            | 1/23/2019 3:29 PM   |
| 13 | 5+                  | 1/2/2019 1:53 PM    |
| 14 | 4                   | 12/18/2018 1:36 PM  |
| 15 | 0                   | 11/28/2018 10:30 PM |
| 16 | about 10 years.     | 11/28/2018 11:59 AM |
| 17 | 4                   | 11/12/2018 10:40 AM |
| 18 | 20+ years           | 11/8/2018 4:43 PM   |
| 19 | 10+                 | 11/7/2018 2:12 PM   |
| 20 | unsure, at least 12 | 11/7/2018 11:47 AM  |
| 21 | New program         | 11/7/2018 9:11 AM   |

## Q10 Total hours of face-to-face EBM education per year:

Answered: 23 Skipped: 12

| #  | RESPONSES        | DATE                |
|----|------------------|---------------------|
| 1  | 8                | 3/7/2019 11:12 AM   |
| 2  | 12               | 3/7/2019 11:11 AM   |
| 3  | Redacted         | 3/7/2019 11:09 AM   |
| 4  | 52               | 3/7/2019 11:08 AM   |
| 5  | 15-20            | 3/7/2019 11:05 AM   |
| 6  | 15               | 3/7/2019 11:04 AM   |
| 7  | 30               | 3/7/2019 11:00 AM   |
| 8  | 6                | 3/7/2019 10:40 AM   |
| 9  | 12               | 3/7/2019 10:38 AM   |
| 10 | 5                | 3/7/2019 10:36 AM   |
| 11 | 10-15            | 2/20/2019 7:09 AM   |
| 12 | Variable         | 1/24/2019 4:16 PM   |
| 13 | 6-7 hours        | 1/23/2019 3:29 PM   |
| 14 | ~2-3             | 1/2/2019 1:53 PM    |
| 15 | 10               | 12/18/2018 1:36 PM  |
| 16 | Redacted         | 11/28/2018 10:30 PM |
| 17 | variable about 5 | 11/28/2018 11:59 AM |
| 18 | 2                | 11/14/2018 2:38 PM  |
| 19 | 7                | 11/12/2018 10:40 AM |
| 20 | 30               | 11/8/2018 4:43 PM   |
| 21 | 8                | 11/7/2018 2:12 PM   |
| 22 | 6                | 11/7/2018 11:47 AM  |
| 23 | 14               | 11/7/2018 9:11 AM   |

### Q11 Who is involved in providing EBM education? (check all that apply)

Answered: 23 Skipped: 12

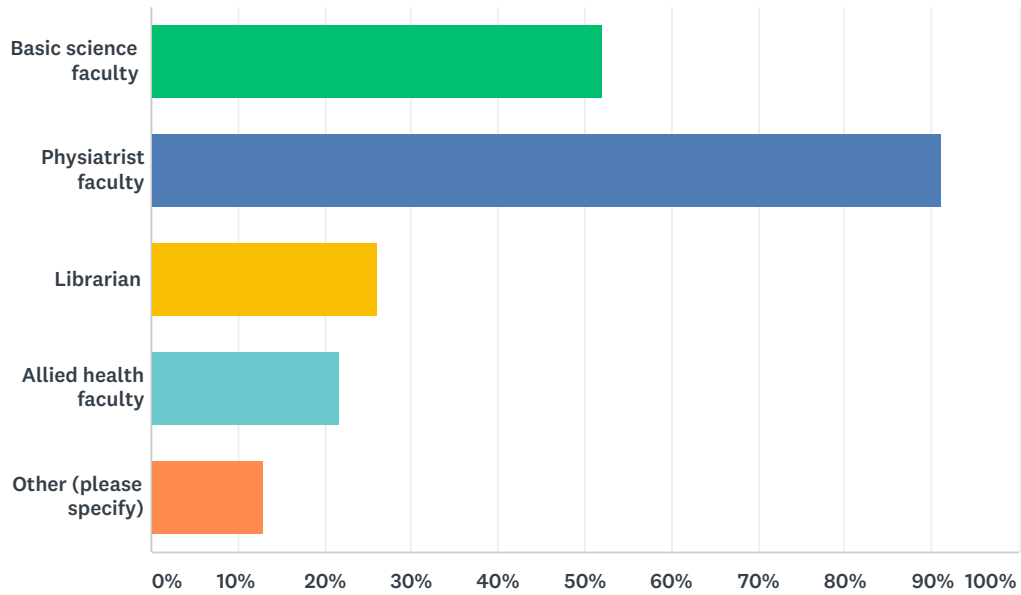

| ANSWER CHOICES         | RESPONSES |
|------------------------|-----------|
| Basic science faculty  | 52.17% 12 |
| Physiatrist faculty    | 91.30% 21 |
| Librarian              | 26.09% 6  |
| Allied health faculty  | 21.74% 5  |
| Other (please specify) | 13.04% 3  |
| Total Respondents: 23  |           |

| # | OTHER (PLEASE SPECIFY)                    | DATE               |
|---|-------------------------------------------|--------------------|
| 1 | Faculty from other departments, residents | 1/23/2019 3:29 PM  |
| 2 | Pediatrics Faculty                        | 1/2/2019 1:53 PM   |
| 3 | internist                                 | 11/14/2018 2:38 PM |

### Q12 Is there an EBM lead/champion among the PM&R faculty?

Answered: 24 Skipped: 11

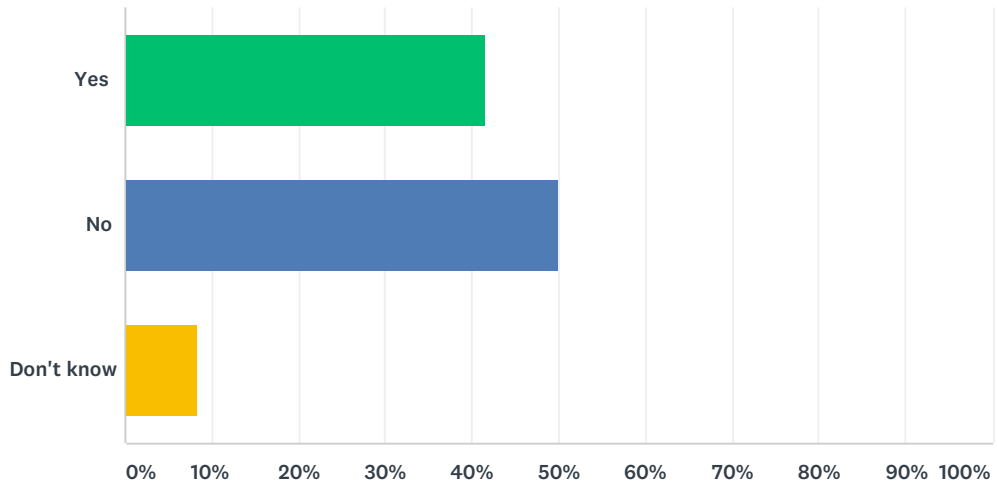

| ANSWER CHOICES | RESPONSES |           |
|----------------|-----------|-----------|
| Yes            | 41.67%    | 10        |
| No             | 50.00%    | 12        |
| Don't know     | 8.33%     | 2         |
| <b>TOTAL</b>   |           | <b>24</b> |

### Q13 What type of assessment exists for EBM education? (check all that apply)

Answered: 24 Skipped: 11

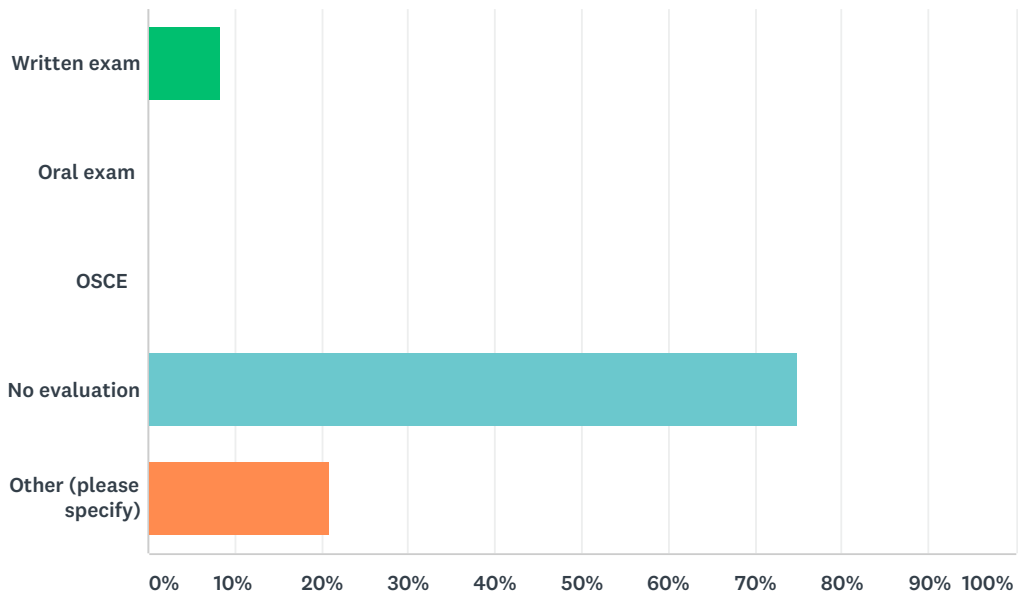

| ANSWER CHOICES         | RESPONSES |
|------------------------|-----------|
| Written exam           | 8.33% 2   |
| Oral exam              | 0.00% 0   |
| OSCE                   | 0.00% 0   |
| No evaluation          | 75.00% 18 |
| Other (please specify) | 20.83% 5  |
| Total Respondents: 24  |           |

| # | OTHER (PLEASE SPECIFY)         | DATE                |
|---|--------------------------------|---------------------|
| 1 | n/a                            | 3/7/2019 11:09 AM   |
| 2 | Posters                        | 3/7/2019 11:08 AM   |
| 3 | Presentations                  | 3/7/2019 11:04 AM   |
| 4 | Research Instrument completion | 11/12/2018 10:40 AM |
| 5 | CAT (see above)                | 11/8/2018 4:43 PM   |

# Q14 Would you be willing to answer a few follow up questions about content of the existing course?

Answered: 24 Skipped: 11

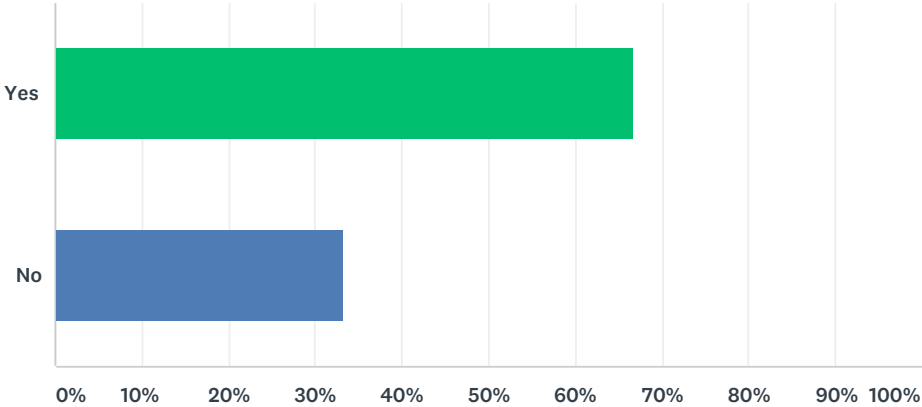

| ANSWER CHOICES | RESPONSES |    |
|----------------|-----------|----|
| Yes            | 66.67%    | 16 |
| No             | 33.33%    | 8  |
| TOTAL          |           | 24 |

Q15 What barriers exist to the implementation of an EBM curriculum in your program? (please rate each on a scale of 0-4, where 0 indicates no barrier and 4 indicates a severe barrier)

Answered: 19 Skipped: 16

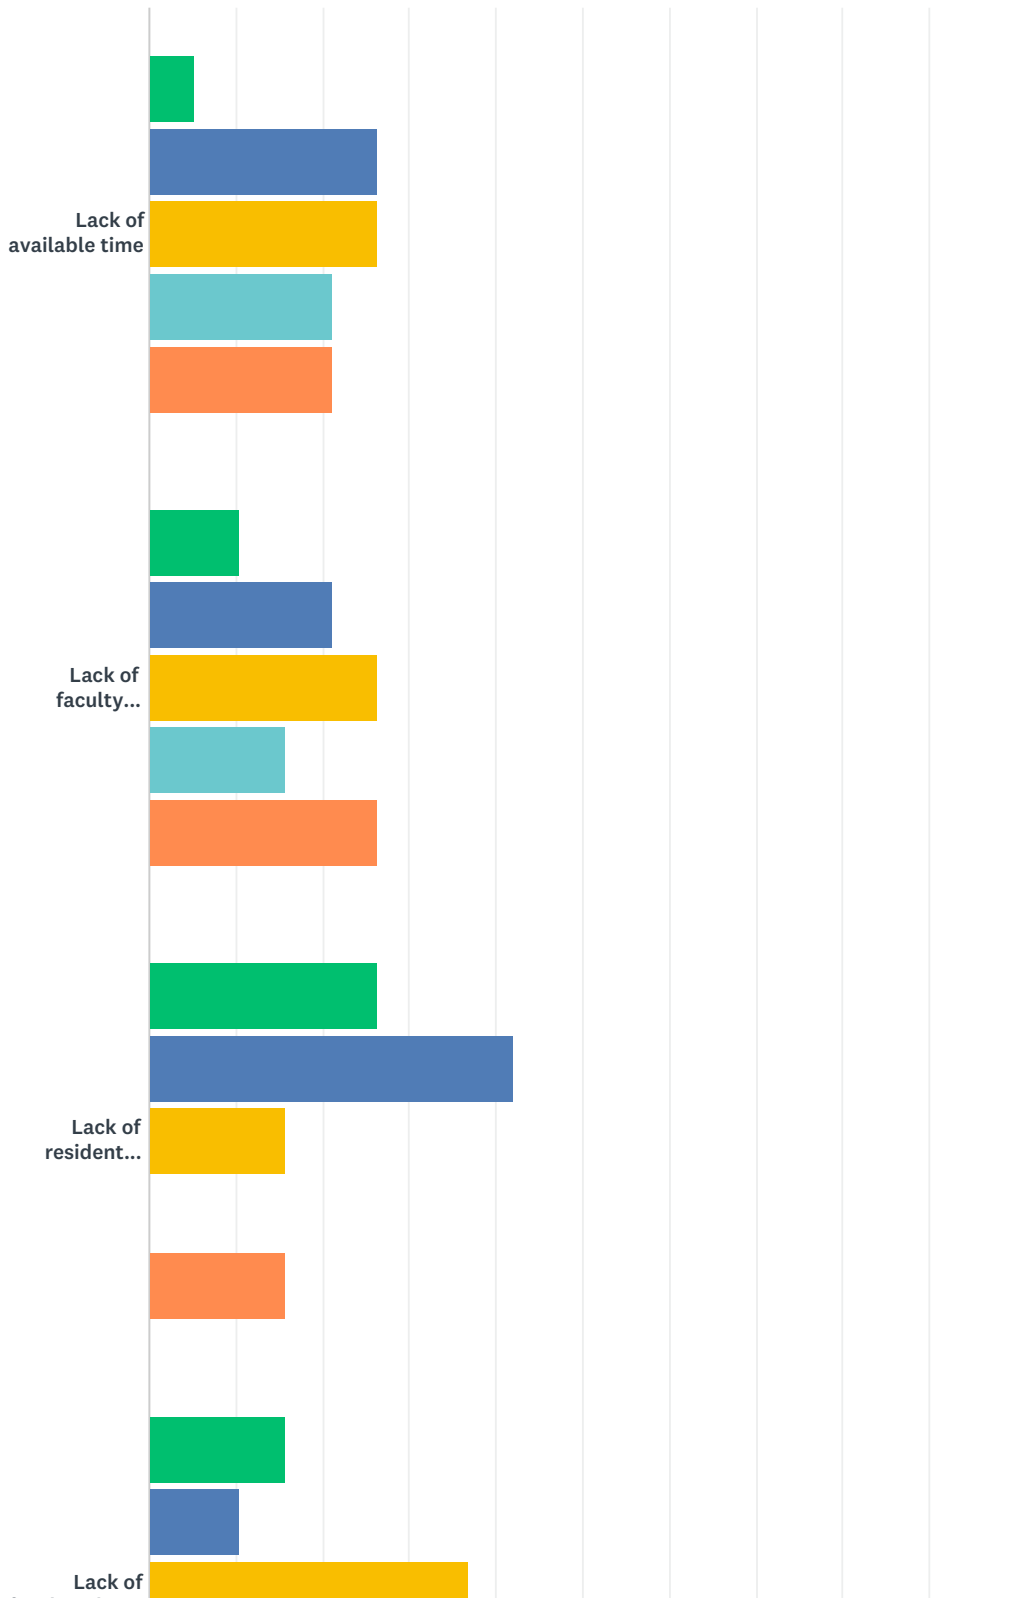



## Evidence-Based Medicine Curriculum Survey

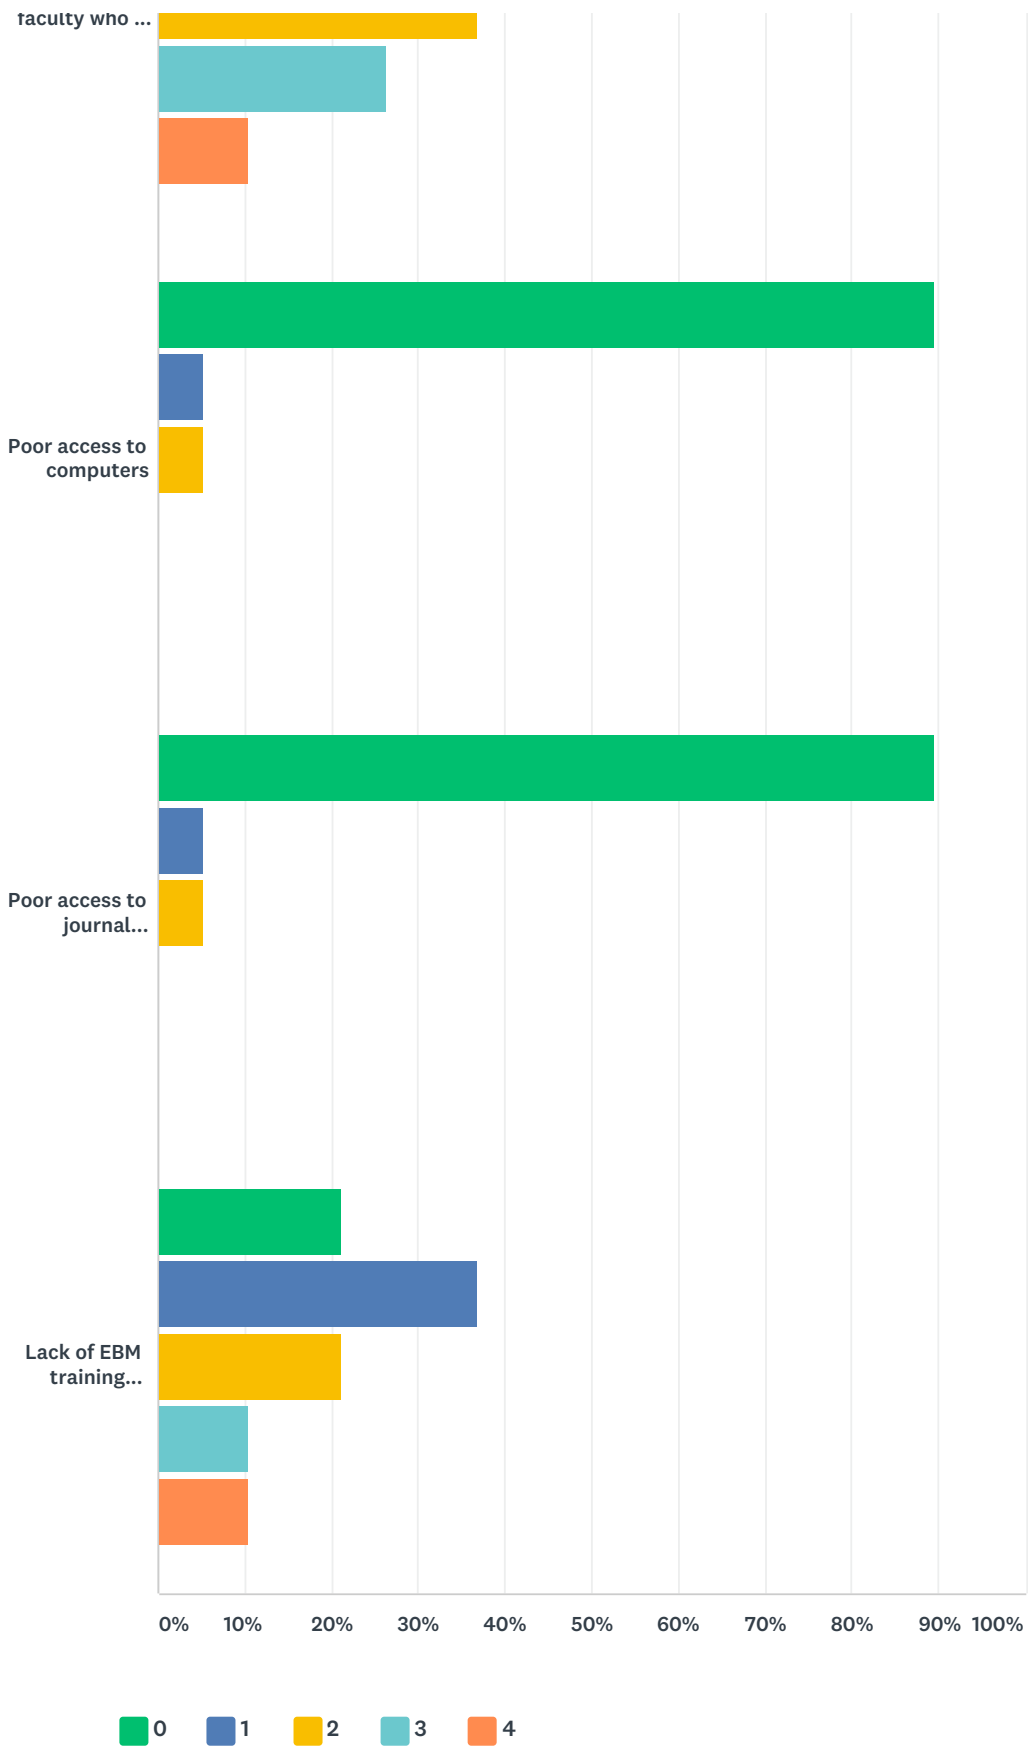

|                        | 0     | 1      | 2      | 3      | 4      | TOTAL |
|------------------------|-------|--------|--------|--------|--------|-------|
| Lack of available time | 5.26% | 26.32% | 26.32% | 21.05% | 21.05% | 19    |
|                        | 1     | 5      | 5      | 4      | 4      |       |

## Evidence-Based Medicine Curriculum Survey

|                                                 |              |             |             |             |             |    |
|-------------------------------------------------|--------------|-------------|-------------|-------------|-------------|----|
| Lack of faculty interest                        | 10.53%<br>2  | 21.05%<br>4 | 26.32%<br>5 | 15.79%<br>3 | 26.32%<br>5 | 19 |
| Lack of resident interest                       | 26.32%<br>5  | 42.11%<br>8 | 15.79%<br>3 | 0.00%<br>0  | 15.79%<br>3 | 19 |
| Lack of faculty who are knowledgeable about EBM | 15.79%<br>3  | 10.53%<br>2 | 36.84%<br>7 | 26.32%<br>5 | 10.53%<br>2 | 19 |
| Poor access to computers                        | 89.47%<br>17 | 5.26%<br>1  | 5.26%<br>1  | 0.00%<br>0  | 0.00%<br>0  | 19 |
| Poor access to journal articles                 | 89.47%<br>17 | 5.26%<br>1  | 5.26%<br>1  | 0.00%<br>0  | 0.00%<br>0  | 19 |
| Lack of EBM training resources                  | 21.05%<br>4  | 36.84%<br>7 | 21.05%<br>4 | 10.53%<br>2 | 10.53%<br>2 | 19 |

| # | OTHER (PLEASE SPECIFY)                                                                                                                                                                                                                     | DATE              |
|---|--------------------------------------------------------------------------------------------------------------------------------------------------------------------------------------------------------------------------------------------|-------------------|
| 1 | It is unclear if 4 is the most important or least important? My answers are presuming 4 is most important. Also, we have education on statistics and deciphering journal articles, however it is not formalized into a specific curriculum | 1/26/2019 2:19 PM |

Q16 How important do you believe the following objectives would be to include in an EBM curriculum (please rate each on a scale of 0-4, where 0 indicates not important and 4 indicates very important)

Answered: 19 Skipped: 16

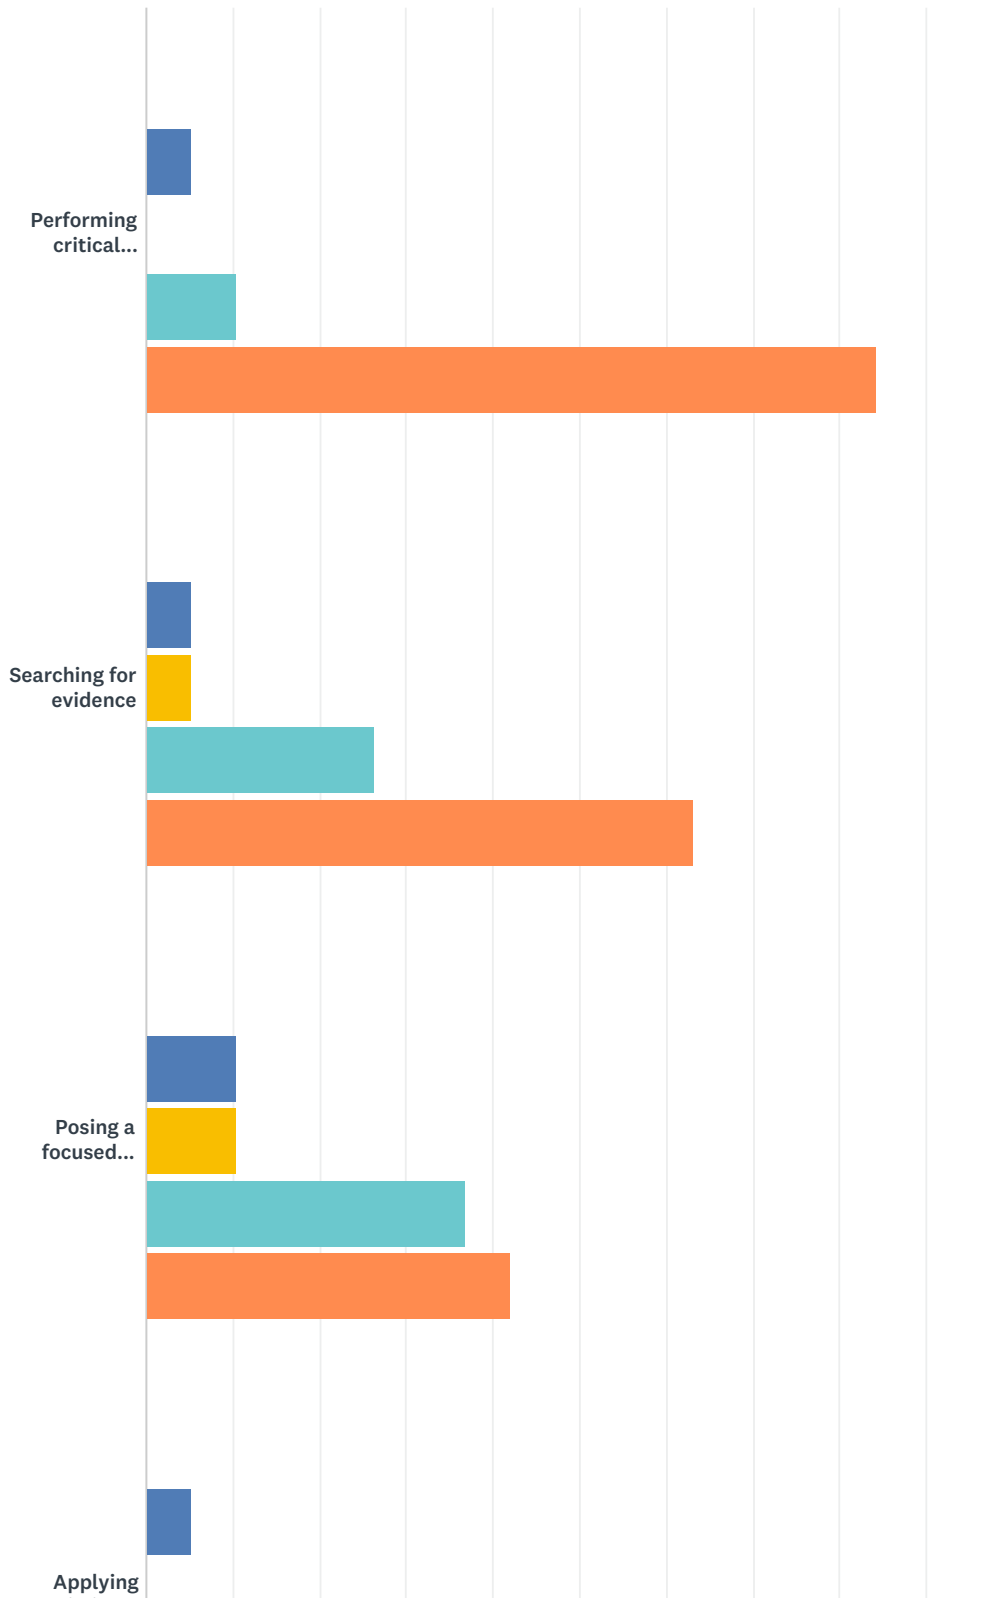

## Evidence-Based Medicine Curriculum Survey

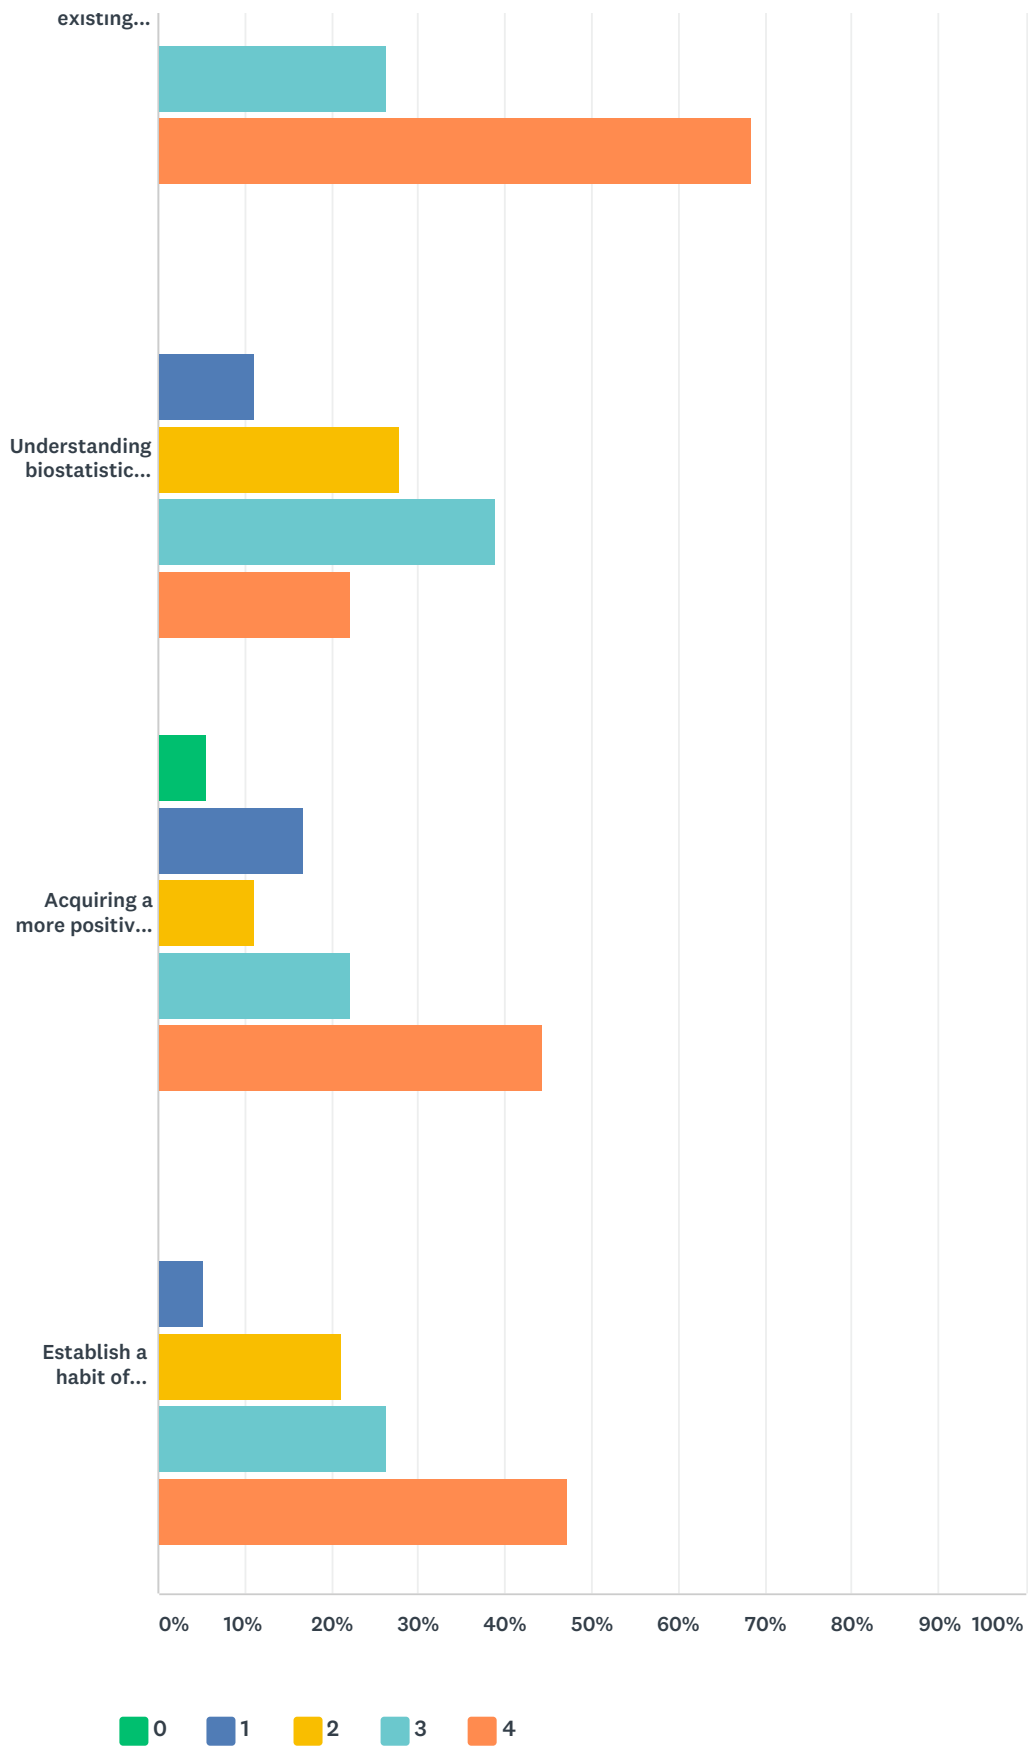

|                                                 | 0     | 1     | 2     | 3      | 4      | TOTAL |
|-------------------------------------------------|-------|-------|-------|--------|--------|-------|
| Performing critical appraisal of the literature | 0.00% | 5.26% | 0.00% | 10.53% | 84.21% |       |
|                                                 | 0     | 1     | 0     | 2      | 16     | 19    |

## Evidence-Based Medicine Curriculum Survey

|                                                                           |            |             |             |             |              |    |
|---------------------------------------------------------------------------|------------|-------------|-------------|-------------|--------------|----|
| Searching for evidence                                                    | 0.00%<br>0 | 5.26%<br>1  | 5.26%<br>1  | 26.32%<br>5 | 63.16%<br>12 | 19 |
| Posing a focused question                                                 | 0.00%<br>0 | 10.53%<br>2 | 10.53%<br>2 | 36.84%<br>7 | 42.11%<br>8  | 19 |
| Applying existing evidence in clinical decision making                    | 0.00%<br>0 | 5.26%<br>1  | 0.00%<br>0  | 26.32%<br>5 | 68.42%<br>13 | 19 |
| Understanding biostatistical principles common to rehabilitation research | 0.00%<br>0 | 11.11%<br>2 | 27.78%<br>5 | 38.89%<br>7 | 22.22%<br>4  | 18 |
| Acquiring a more positive attitude toward EBM                             | 5.56%<br>1 | 16.67%<br>3 | 11.11%<br>2 | 22.22%<br>4 | 44.44%<br>8  | 18 |
| Establish a habit of lifelong learning and using EBM in clinical practice | 0.00%<br>0 | 5.26%<br>1  | 21.05%<br>4 | 26.32%<br>5 | 47.37%<br>9  | 19 |

| # | OTHER (PLEASE SPECIFY)                   | DATE              |
|---|------------------------------------------|-------------------|
| 1 | I think attitude is already pretty good. | 3/7/2019 11:06 AM |
