# Supplementary material
Source: PubMed Central journal article supplement (PMC9444380)
Supplement: NIHMS1695412-supplement-Appendix_IV.pdf [file NIHMS1695412-supplement-Appendix_IV.pdf]

## Q1 Residency Program Name

Answered: 28 Skipped: 0

| #  | RESPONSES | DATE                |
|----|-----------|---------------------|
| 1  | Redacted  | 12/9/2019 5:13 PM   |
| 2  | Redacted  | 11/25/2019 11:17 AM |
| 3  | Redacted  | 11/21/2019 12:50 PM |
| 4  | Redacted  | 11/20/2019 11:30 AM |
| 5  | Redacted  | 11/19/2019 6:04 PM  |
| 6  | Redacted  | 11/18/2019 4:48 PM  |
| 7  | Redacted  | 11/18/2019 4:29 PM  |
| 8  | Redacted  | 11/12/2019 6:39 PM  |
| 9  | Redacted  | 11/11/2019 9:09 PM  |
| 10 | Redacted  | 11/11/2019 8:55 PM  |
| 11 | Redacted  | 10/31/2019 10:19 AM |
| 12 | Redacted  | 10/7/2019 12:46 PM  |
| 13 | Redacted  | 10/3/2019 3:19 PM   |
| 14 | Redacted  | 10/3/2019 12:11 PM  |
| 15 | Redacted  | 10/3/2019 11:21 AM  |
| 16 | Redacted  | 10/3/2019 10:54 AM  |
| 17 | Redacted  | 10/3/2019 10:49 AM  |
| 18 | Redacted  | 10/3/2019 10:43 AM  |
| 19 | Redacted  | 10/3/2019 10:19 AM  |
| 20 | Redacted  | 10/2/2019 4:10 PM   |
| 21 | Redacted  | 10/2/2019 11:44 AM  |
| 22 | Redacted  | 8/19/2019 11:01 AM  |
| 23 | Redacted  | 8/18/2019 2:46 PM   |
| 24 | Redacted  | 8/16/2019 2:46 PM   |
| 25 | Redacted  | 8/9/2019 3:21 PM    |
| 26 | Redacted  | 8/9/2019 10:59 AM   |
| 27 | Redacted  | 8/9/2019 10:51 AM   |
| 28 | Redacted  | 8/9/2019 9:24 AM    |

## Q2 Introduction to EBP

Answered: 28 Skipped: 0

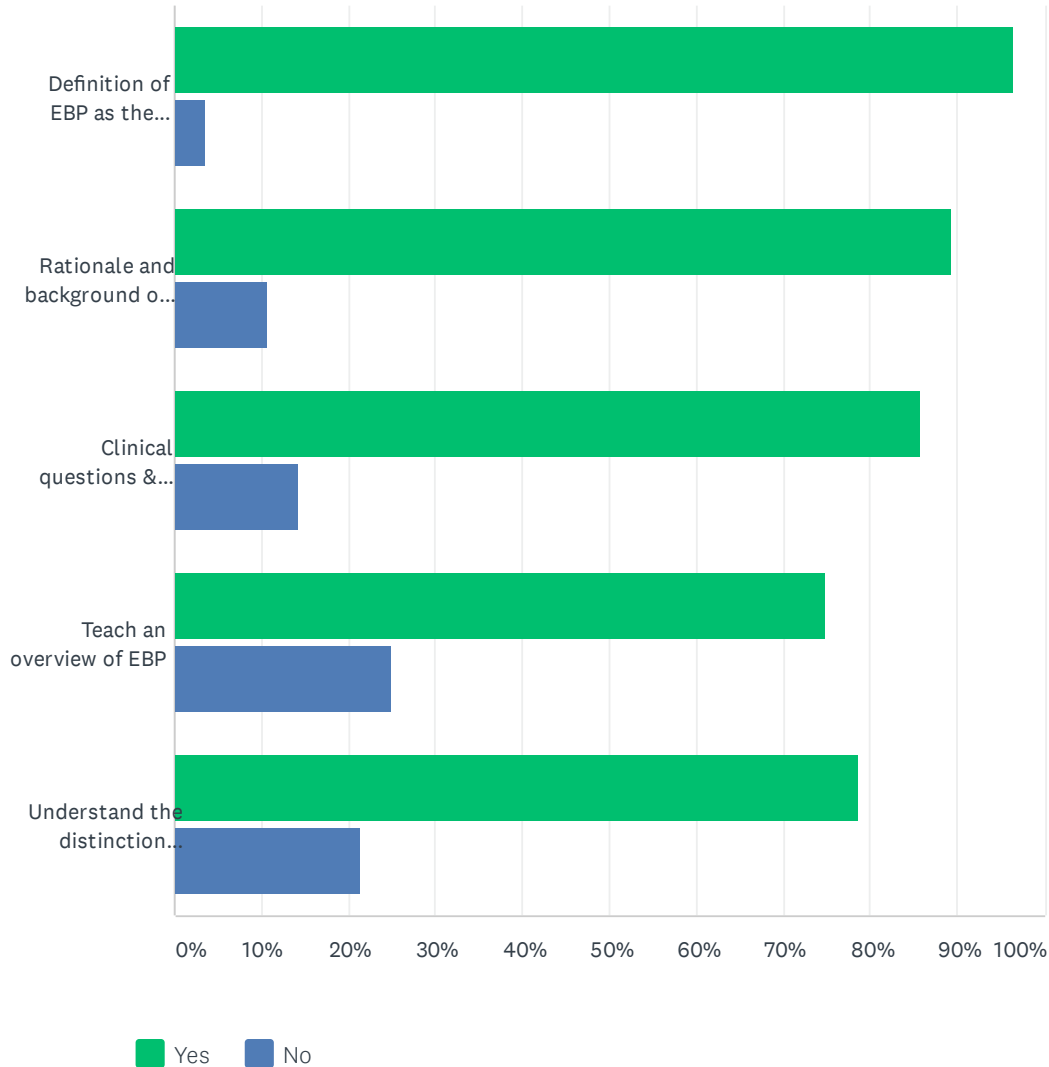

|                                                                                                                                         | YES          | NO          | TOTAL | WEIGHTED AVERAGE |
|-----------------------------------------------------------------------------------------------------------------------------------------|--------------|-------------|-------|------------------|
| Definition of EBP as the integration of the best research evidence with clinical expertise and patient's unique values and circumstance | 96.43%<br>27 | 3.57%<br>1  | 28    | 1.04             |
| Rationale and background of EBP                                                                                                         | 89.29%<br>25 | 10.71%<br>3 | 28    | 1.11             |
| Clinical questions & study designs (different types)                                                                                    | 85.71%<br>24 | 14.29%<br>4 | 28    | 1.14             |
| Teach an overview of EBP                                                                                                                | 75.00%<br>21 | 25.00%<br>7 | 28    | 1.25             |
| Understand the distinction between using research to inform clinical decision-making vs. conducting research                            | 78.57%<br>22 | 21.43%<br>6 | 28    | 1.21             |

## AAP Evidence-Based Practice (EBP) Survey

| # | COMMENTS:                                                                                                                                                                                                                                                                                                                                                                                                                                                                                                                                         | DATE                |
|---|---------------------------------------------------------------------------------------------------------------------------------------------------------------------------------------------------------------------------------------------------------------------------------------------------------------------------------------------------------------------------------------------------------------------------------------------------------------------------------------------------------------------------------------------------|---------------------|
| 1 | topics are included in annual research module lectures and in monthly journal club discussions.                                                                                                                                                                                                                                                                                                                                                                                                                                                   | 12/9/2019 5:13 PM   |
| 2 | We have 10 hours of research curriculum in the beginning of the year which is a combination of didactics, interactive group and homework which includes formulating a hypothesis, construction and evaluation of study design, reviewing literature, statistical methods, IRB processes, faculty panels on clinical research applications, research team work, library sciences, ethics, etc. This culminates in a research day with poster and oral presentations including basic and clinical sciences with all the affiliated sites - Redacted | 11/20/2019 11:30 AM |
| 3 | We go over a lot of these things in journal clubs but not formal didactic lecture                                                                                                                                                                                                                                                                                                                                                                                                                                                                 | 11/18/2019 4:48 PM  |
| 4 | We do not have a single lecture(s) series to cover all these domains of EBP                                                                                                                                                                                                                                                                                                                                                                                                                                                                       | 11/12/2019 6:39 PM  |
| 5 | The last question regarding research confused me a bit. I responded Yes eg, Our Journal Club activities can and often do make this distinction.                                                                                                                                                                                                                                                                                                                                                                                                   | 10/3/2019 10:49 AM  |

### Q3 Ask (Step 1)

Answered: 28 Skipped: 0

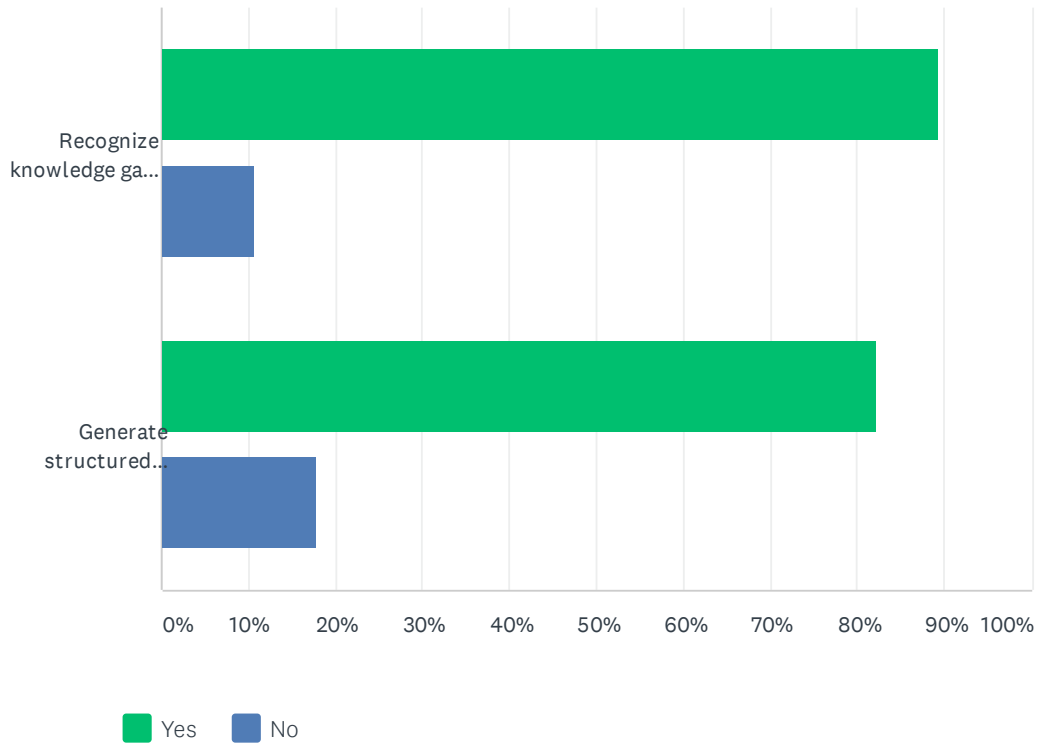

|                                                   | YES          | NO          | TOTAL |
|---------------------------------------------------|--------------|-------------|-------|
| Recognize knowledge gaps in practice              | 89.29%<br>25 | 10.71%<br>3 | 28    |
| Generate structured answerable clinical questions | 82.14%<br>23 | 17.86%<br>5 | 28    |

| # | COMMENTS:                                                                                                             | DATE               |
|---|-----------------------------------------------------------------------------------------------------------------------|--------------------|
| 1 | Are you talking about knowledge gaps in their personal practice, or, knowledge In general and rehabilitation medicine | 11/18/2019 4:29 PM |

## Q4 Acquire (Step 2)

Answered: 28 Skipped: 0

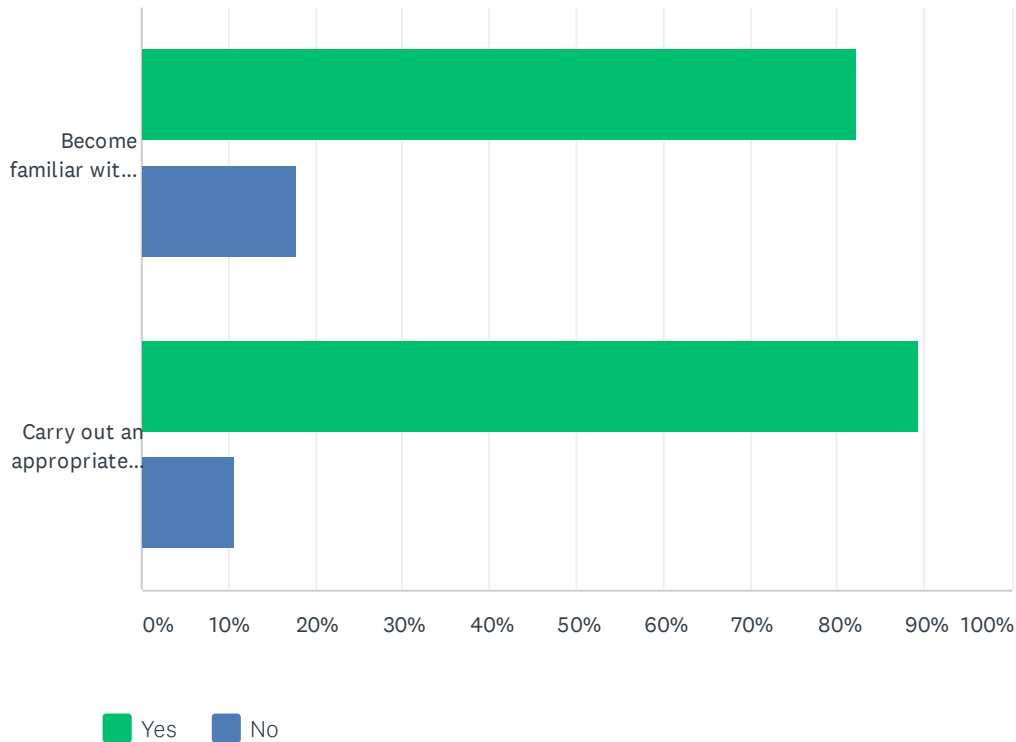

|                                                                                                                                              | YES          | NO          | TOTAL |
|----------------------------------------------------------------------------------------------------------------------------------------------|--------------|-------------|-------|
| Become familiar with sources of research information, including biomedical research databases and filtered or pre-appraised evidence sources | 82.14%<br>23 | 17.86%<br>5 | 28    |
| Carry out an appropriate literature search for clinical questions                                                                            | 89.29%<br>25 | 10.71%<br>3 | 28    |

| # | COMMENTS:                                                                                                                                                                                                                                                                                                                                                                                                     | DATE               |
|---|---------------------------------------------------------------------------------------------------------------------------------------------------------------------------------------------------------------------------------------------------------------------------------------------------------------------------------------------------------------------------------------------------------------|--------------------|
| 1 | We do teach skill in lit search An opportunity for us (work in progress) and an opportunity in your survey - Do we teach, train, and deliberately practice the skills of synthesis of trying to understand and solve interrelated clinical question - This is the challenge in EBP - Scientists are good at evidence for singular clinical question yet evidence is lacking in interrelated clinical problems | 10/3/2019 10:49 AM |

### Q5 Appraise and Interpret (Step 3)

Answered: 28 Skipped: 0

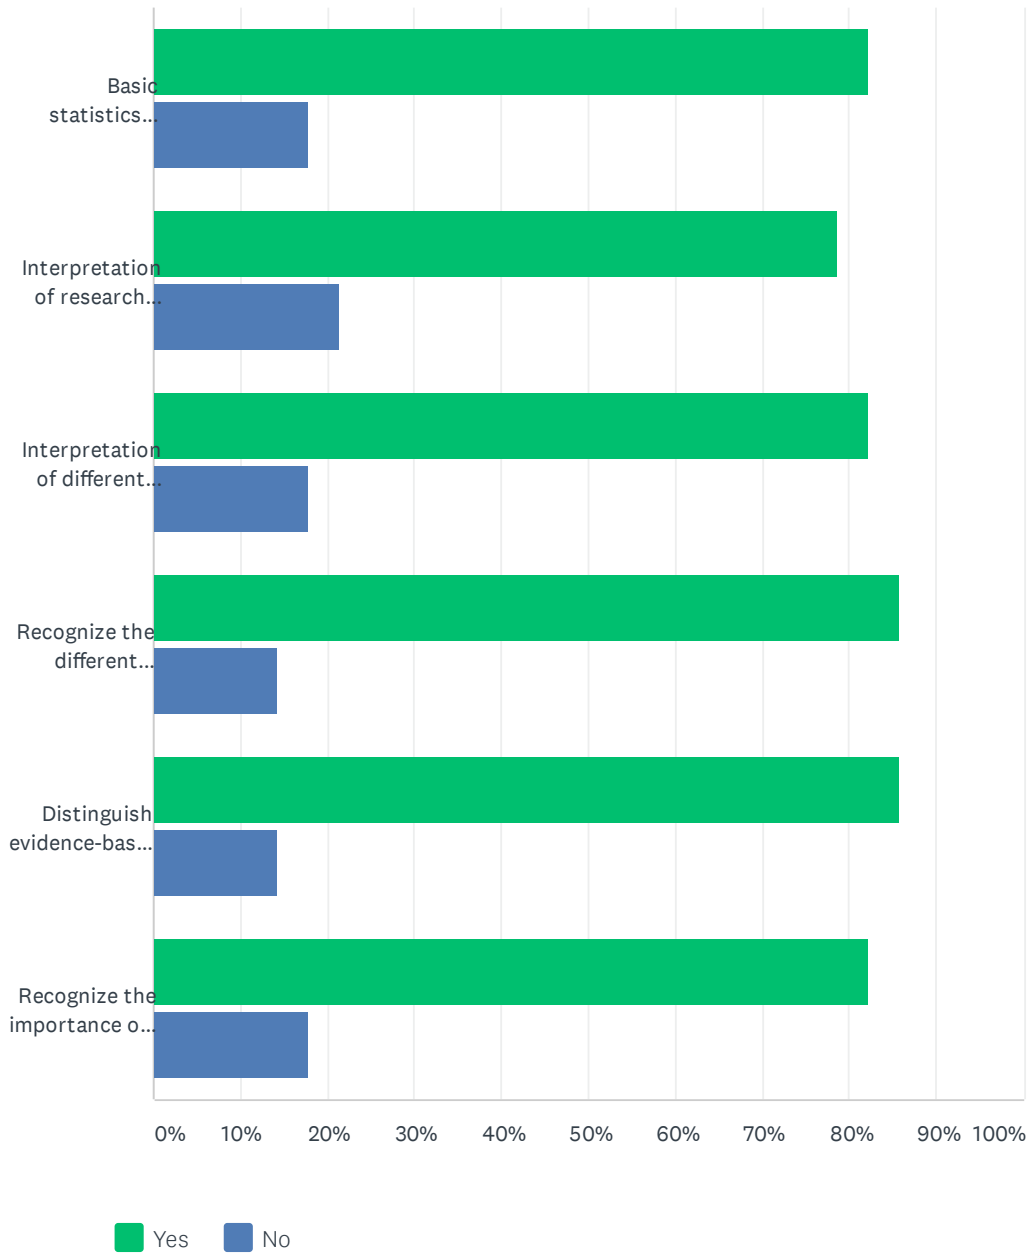

## AAP Evidence-Based Practice (EBP) Survey

|                                                                                                                                                      | YES          | NO          | TOTAL |
|------------------------------------------------------------------------------------------------------------------------------------------------------|--------------|-------------|-------|
| Basic statistics (e.g., error, bias, reliability, validity, difference between statistical significance and minimal clinically important difference) | 82.14%<br>23 | 17.86%<br>5 | 28    |
| Interpretation of research directions as related to diagnostic accuracy, prognostic evaluation and treatment effects                                 | 78.57%<br>22 | 21.43%<br>6 | 28    |
| Interpretation of different types of study design (e.g., systematic review, meta-analysis, controlled trial, observational study)                    | 82.14%<br>23 | 17.86%<br>5 | 28    |
| Recognize the different levels of evidence                                                                                                           | 85.71%<br>24 | 14.29%<br>4 | 28    |
| Distinguish evidence-based from opinion-based clinical practice guidelines                                                                           | 85.71%<br>24 | 14.29%<br>4 | 28    |
| Recognize the importance of considering conflict of interest and funding sources                                                                     | 82.14%<br>23 | 17.86%<br>5 | 28    |

| # | COMMENTS:                                                                               | DATE               |
|---|-----------------------------------------------------------------------------------------|--------------------|
| 1 | I think we do ALL of these things regularly in journal club but not a formal curriculum | 11/18/2019 4:48 PM |
| 2 | We do a lot of this in Journal club but it is not as well structured as it could be     | 11/18/2019 4:29 PM |
| 3 | We are in the process of overhauling journal club to address gaps listed above          | 11/12/2019 6:39 PM |
| 4 | We do these things to some degree, but could surely do better.                          | 11/11/2019 9:09 PM |
| 5 | PhD led                                                                                 | 8/9/2019 9:24 AM   |

## Q6 Apply (Step 4)

Answered: 28 Skipped: 0

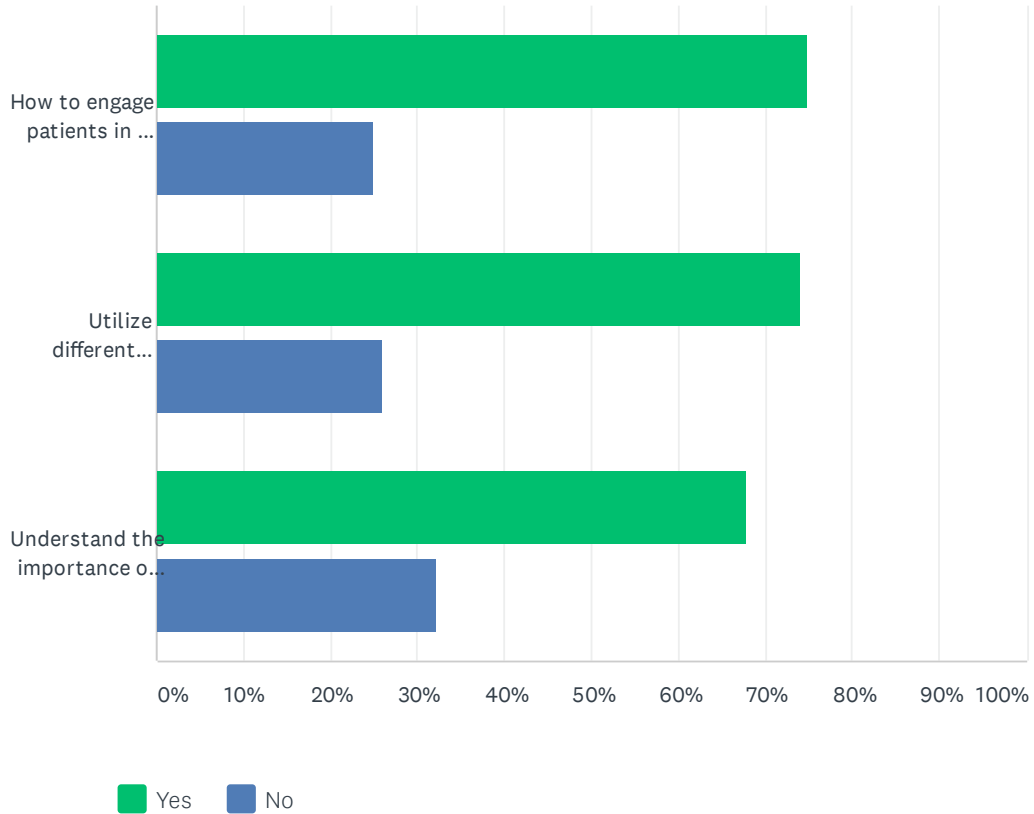

|                                                                                                                                 | YES          | NO          | TOTAL |
|---------------------------------------------------------------------------------------------------------------------------------|--------------|-------------|-------|
| How to engage patients in the decision-making process, using shared decision making                                             | 75.00%<br>21 | 25.00%<br>7 | 28    |
| Utilize different strategies to manage uncertainty in clinical decision-making in practice (including ethical and legal issues) | 74.07%<br>20 | 25.93%<br>7 | 27    |
| Understand the importance of baseline risk of individual patients when estimating individual expected benefit                   | 67.86%<br>19 | 32.14%<br>9 | 28    |



## Q7 Evaluate (Step 5)

Answered: 28 Skipped: 0

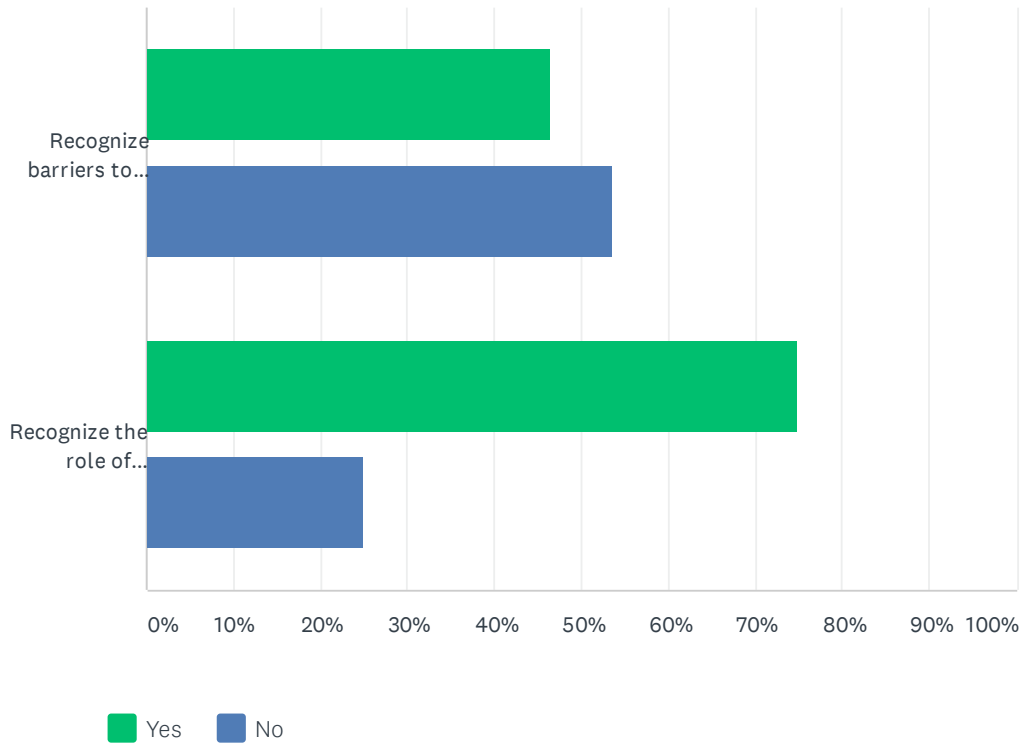

|                                                                                                                        | YES          | NO           | TOTAL |
|------------------------------------------------------------------------------------------------------------------------|--------------|--------------|-------|
| Recognize barriers to knowledge translation and strategies to overcome these                                           | 46.43%<br>13 | 53.57%<br>15 | 28    |
| Recognize the role of personal skill assessment and quality improvement in the context of reflective clinical practice | 75.00%<br>21 | 25.00%<br>7  | 28    |

| # | COMMENTS:                                                                                                                                                                         | DATE               |
|---|-----------------------------------------------------------------------------------------------------------------------------------------------------------------------------------|--------------------|
| 1 | it helps to have all residents use the Milestone tool as a self-reflection and goal-setting tool semi-annually to remind us all of knowledge/skill gaps and strategies to improve | 12/9/2019 5:13 PM  |
| 2 | We are nowhere near this                                                                                                                                                          | 11/18/2019 4:29 PM |
